# Supplementary material for: The local electron attachment energy and the electrostatic potential as descriptors of surface–adsorbate interactions
Source: Royal Society of Chemistry journal article supplement (doi:10.1039/c9cp03099a), 2019-01-01
Supplement: c9cp03099a1.pdf [file c9cp03099a1.pdf]

**Supporting Information for:**

# The Local Electron Attachment Energy and the Electrostatic Potential as Descriptors of Surface- Adsorbate Interactions

*Joakim H. Stenlid,<sup>ab</sup> A. Johannes Johansson,<sup>c</sup> Tore Brinck<sup>a\*</sup>*

<sup>a</sup> Applied Physical Chemistry, Department of Chemistry, CBH, KTH Royal Institute of Technology, SE-100 44 Stockholm, Sweden, <sup>b</sup> Department of Physics, AlbaNova University Center, Stockholm University, SE-106 91 Stockholm, Sweden, <sup>c</sup> Swedish Nuclear Fuel and Waste Management Co (SKB), Box 250, Stockholm, Sweden

\*E-mail: [tore@kth.se](mailto:tore@kth.se), [joakim.halldin-stenlid@fysik.su.se](mailto:joakim.halldin-stenlid@fysik.su.se)

## ADSORPTION FIGURE OPTIMAL SCALES

Figure S1 shows the descriptor map images from Figure 5 of the main article with optimized color scales for the individual particles.

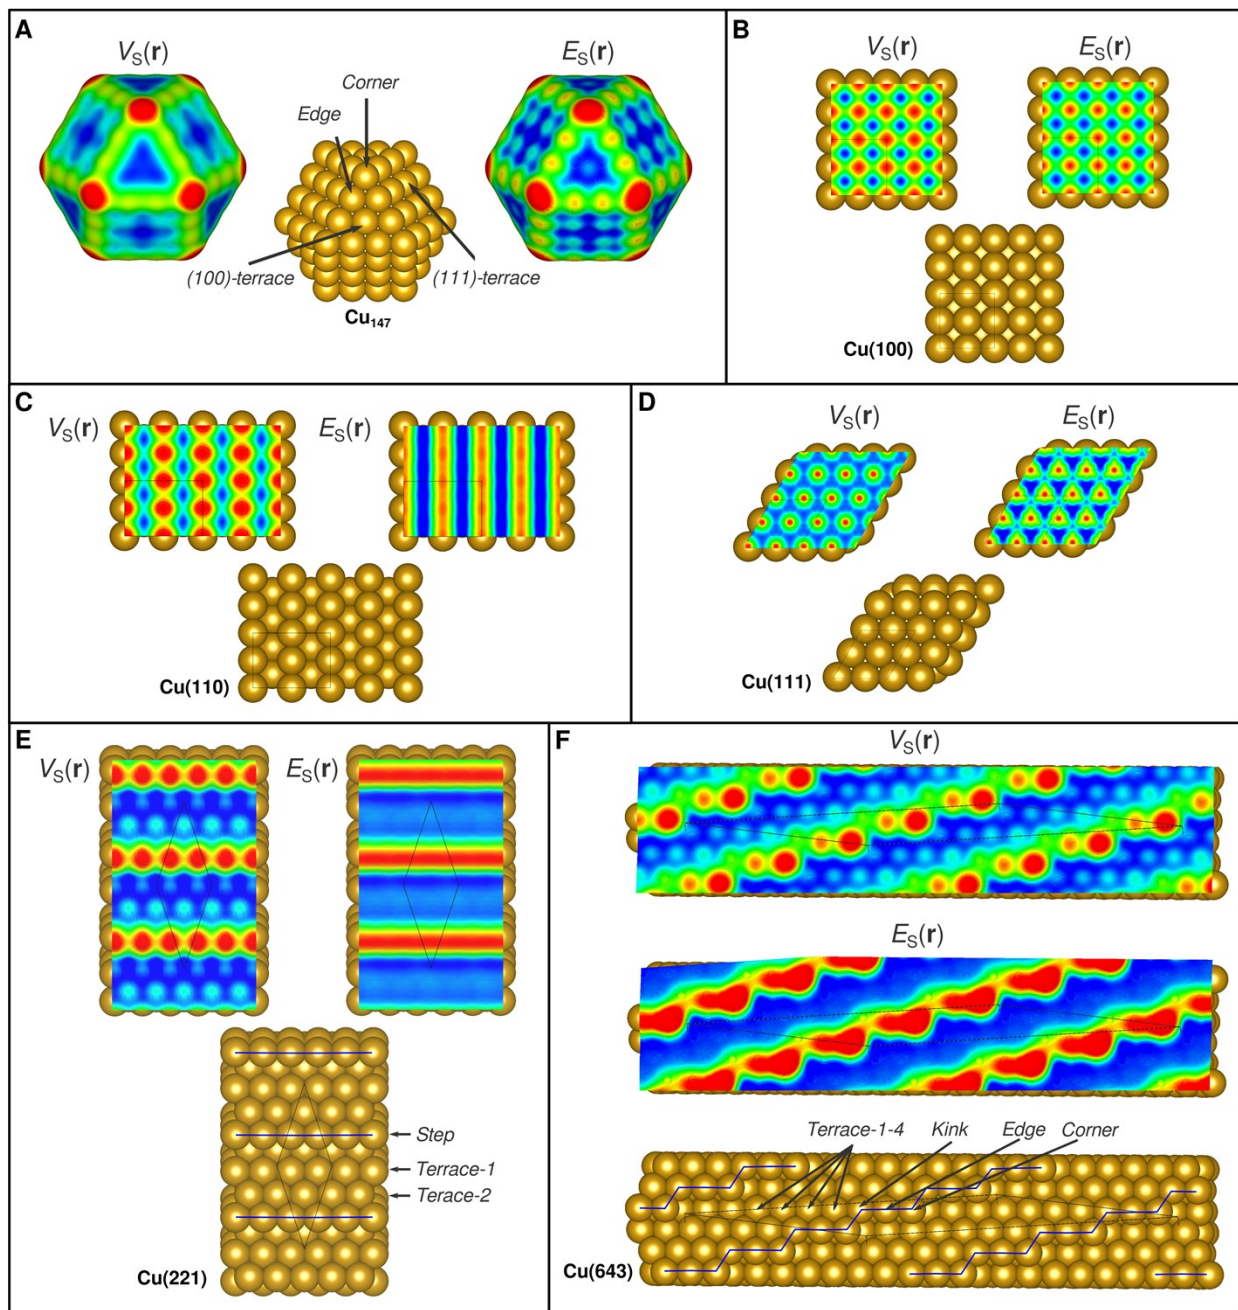

**Figure S1.** Descriptor map images from Figure 5 of the main article using optimized color scales.

## CONVERGENCE TEST

Tables S1-S4 below contains computed  $V_{S,\max}$  and  $E_{S,\min}$  values for the Cu(100) surface as a function of variation of a number of parameters. These include the number of  $\mathbf{k}$ -points, the vacuum distance, the plane-wave cut-off, and the number of Cu layers in the slab. The standard set-up used for the parameters that are not varied are: 11x11x1  $\mathbf{k}$ -points, 800 eV plane-wave cut-off, 40 Å slab vacuum, and a slab thickness of 10 Cu layers.

In conclusion we can note that  $V_{S,\max}$  is very robust to the parameter variations and differs significantly from the converged value only for the most crude parameter choices.  $E_{S,\min}$  varies more, but is converged at the set-ups used in the main text. Further tests will be conducted in future studies.

**Table S1.** K-point test.

| <b>k-points</b> | <b><math>E_{S,\min}</math> (eV)</b> | <b><math>V_{S,\max}</math> (eV)</b> |
|-----------------|-------------------------------------|-------------------------------------|
| 15×15×1         | -7.73                               | 0.34                                |
| 13×13×1         | -7.73                               | 0.34                                |
| <b>11×11×1</b>  | <b>-7.73</b>                        | <b>0.34</b>                         |
| 9×9×1           | -7.78                               | 0.34                                |
| 8×8×1           | -7.82                               | 0.34                                |
| 6×6×1           | -7.84                               | 0.34                                |
| 4×4×1           | -7.86                               | 0.34                                |
| 2×2×1           | -7.78                               | 0.35                                |
| 1×1×1           | -8.46                               | 0.36                                |

**Table S2.** Vacuum test.

| Vacuum ( $\text{\AA}$ ) | $E_{S,\min}$ (eV) | $V_{S,\max}$ (eV) |
|-------------------------|-------------------|-------------------|
| 60                      | -7.73             | 0.34              |
| 50                      | -7.73             | 0.34              |
| <b>40</b>               | <b>-7.73</b>      | <b>0.34</b>       |
| 30                      | -7.57             | 0.35              |
| 20                      | -7.30             | 0.33              |
| 15                      | -7.28             | 0.34              |
| 10                      | -7.25             | 0.33              |

**Table S3.** Slab thickness test.

| Thickness (layers) | $E_{S,\min}$ (eV) | $V_{S,\max}$ (eV) |
|--------------------|-------------------|-------------------|
| 14                 | -7.73             | 0.34              |
| 12                 | -7.73             | 0.34              |
| <b>10</b>          | <b>-7.73</b>      | <b>0.34</b>       |
| 9                  | -7.72             | 0.34              |
| 8                  | -7.68             | 0.34              |
| 6                  | -7.56             | 0.33              |
| 4 <sup>a</sup>     | -7.49             | 0.33              |
| 2 <sup>a</sup>     | -6.96             | 0.33              |

<sup>a</sup> Note that for these structures the full slab was allowed to relax without constraints.

**Table S4.** Plane-wave cut-off test.

| <b>k-points</b> | $E_{S,\min}$ (eV) | $V_{S,\max}$ (eV) |
|-----------------|-------------------|-------------------|
| <b>800</b>      | <b>-7.73</b>      | <b>0.34</b>       |
| 700             | -7.74             | 0.34              |
| 600             | -7.75             | 0.34              |
| 500             | -7.75             | 0.34              |
| 400             | -7.75             | 0.34              |
| 300             | -8.56             | 0.51              |
